# Supplementary material for: Prevalence and Behavioral Factors Associated with Penile and Rectal HPV Infection among Men Who Have Sex with Men in Kenya
Source: Research Square preprint supplement (doi:10.21203/rs.3.rs-9335695/v1), 2026-04-23
Supplement: Supplementary file 1 [file 2a99e527bef84f9b69a4ea5d.docx]

**Supplemental Table 1. Distribution of Factors by Having Any (Penile or Rectal) HPV test**

|  | **HPV test**  **N=202** | **No HPV Test**  **N=48** | **P-value1** |
| --- | --- | --- | --- |
| **Mean age in years (SD)** | 26.4 (5.1) | 28.3 (3.5) | 0.002 |
|  | n (%) | n (%) |  |
| 18-24 years | 81 (40.1) | 6 (12.5) | 0.001 |
| 25-29 years | 72 (35.6) | 24 (50.0) |  |
| 30-39 years | 49 (24.3) | 18 (37.5) |  |
| **Cis-Male** | 187 (92.6) | 46 (95.8) | 0.539 |
| **Secondary education or higher** |  |  | 0.986 |
| Less than secondary | 53 (26.4) | 13 (27.1) |  |
| Completed secondary | 87 (43.3) | 21 (43.7) |  |
| Post secondary | 61 (30.3) | 14 (29.2) |  |
| **Employment status** |  |  | 0.098 |
| Unemployed | 57 (28.2) | 7 (14.6) |  |
| Employed (part time or full time) | 38 (18.8) | 8 (16.7) |  |
| Self-employed, between jobs | 107 (53.0) | 33 (68.7) |  |
| **Circumcised** | 183 (90.6) | 42 (87.5) | 0.521 |
| **Receptive anal sex with male partner ever** | 132 (63.4) | 34 (70.8) | 0.502 |
| **Insertive anal sex with male partner ever** | 182 (89.1) | 43 (89.6) | 0.915 |
| **Total different males had sex with in the last 6 months** |  |  | 0.679 |
| 0-1 | 53 (26.4) | 12 (25.0) |  |
| 2 or more | 124 (61.7) | 28 (58.3) |  |
| Missing | 24 (11.9) | 8 (16.7) |  |
| **HIV positive** | 14 (6.9) | 5 (10.4) | 0.377 |
| **Tested positive for urethral chlamydia and/or gonorrhea** | 21 (10.4) | 2 (4.2) | 0.267 |
| **Tested positive for rectal chlamydia and/or gonorrhea** | 9 (4.6) | 0 (0) | 0.213 |

1 Wilcoxon rank sum p-value for comparison of age as a continuous variable; chi-square p-value for categorical variables (Fisher’s exact p-value reported where any n<5).
