# Supplementary material for: Prevalence and Behavioral Factors Associated with Penile and Rectal HPV Infection among Men Who Have Sex with Men in Kenya
Source: Research Square preprint supplement (doi:10.21203/rs.3.rs-9335695/v1), 2026-04-23
Supplement: Supplementary file 2 [file bd3aa638998b9a093b8ebf62.docx]

**Table 1. Distribution of Participant Characteristics Overall and by Penile High Risk HPV Status**

| **Variable** | **Penile HR-HPV**  **Negative N=119 (75.3%)**  **n (%)** | **Penile HR-HPV Positive N=39 (24.7%)**  **n (%)** | **Total,**  **N=158**  **n (%)** | **P-value1** |
| --- | --- | --- | --- | --- |
| **Sociodemographics** |  |  |  |  |
| **Age group (years)** |  |  |  |  |
| 18-24 | 47 (72.3) | 18 (27.7) | 65 (41.1) | 0.748 |
| 25-29 | 43 (78.2) | 12 (21.8) | 55 (34.8) |  |
| 30-39 | 29 (76.3) | 9 (23.7) | 38 (24.1) |  |
| **Gender** |  |  |  |  |
| Man/Cis-male | 111 (76.6) | 34 (23.4) | 145 (91.8) | 0.229 |
| Other | 8 (61.5) | 5(38.5) | 13 (8.2) |  |
| **Educational attainment** |  |  |  |  |
| Less than secondary school | 28 (68.3) | 13 (31.7) | 41 (26.1) | 0.474 |
| Completed secondary school | 55 (78.6) | 15 (21.4) | 70 (44.6) |  |
| Higher than secondary school | 35 (76.1) | 11 (23.9) | 46 (29.3) |  |
| **Current employment status** |  |  |  |  |
| Unemployed | 34 (70.8) | 14 (29.2) | 48 (30.4) | **0.048** |
| Employed part-time or full time | 29 (93.6) | 2 (6.5) | 31 (19.6) |  |
| Self-employed | 27 (71.1) | 11 (29.0) | 38 (24.0) |  |
| Between jobs/Other | 29 (70.7) | 12 (29.3) | 41 (26.0) |  |
| **Biological Factors** |  |  |  |  |
| **Circumcision Status** |  |  |  |  |
| Uncircumcised | 7 (50) | 7 (50) | 14 (8.9) | **0.021** |
| Circumcised | 112 (77.8) | 32 (22.2) | 144 (91.1) |  |
| **HIV Status** |  |  |  |  |
| Negative | 115 (77.2) | 34 (22.8) | 149 (94.3) | **0.028** |
| Positive | 4 (44.4) | 5 (55.6) | 9 (5.7) |  |
| **Urethral chlamydia and/or gonorrhea test results** |  |  |  |  |
| Negative | 106 (75.7) | 34 (24.3) | 140 (88.6) | 0.746 |
| Positive | 13 (72.2) | 5 (27.8) | 18 (11.4) |  |
| **Behavioral Factors** |  |  |  |  |
| **Receptive anal sex with a male partner ever** |  |  |  |  |
| No | 39 (76.4) | 12 (23.6) | 51 (32.3) | 0.816 |
| Yes | 80 (74.8) | 27 (25.2) | 107 (67.7) |  |
| **Insertive anal sex with a male partner ever** |  |  |  |  |
| No | 15 (93.8) | 1 (6.2) | 16 (10.1) | **0.122** |
| Yes | 104 (73.2) | 38 (26.7) | 142 (89.9) |  |
| **Vaginal or anal sex with a cisgender woman ever** |  |  |  |  |
| No | 44 (80.0) | 11 (20.0) | 55 (35.0) | 0.367 |
| Yes | 75 (73.5) | 27 (26.4) | 102 (65.0) |  |
| Refuse to Answer | 0 | 1 | 1 |  |
| **Total different males had sex with in the past 6 months** |  |  |  | 0.966 |
| 0-1 | 32 (78.0) | 9 (22.0) | 41 (26.1) |  |
| 2 | 28 (75.7) | 9 (24.3) | 37 (23.6) |  |
| 3 | 19 (79.2) | 5 (20.8) | 24 (15.3) |  |
| 4 or more | 25 (73.5) | 9 (26.4) | 34 (21.7) |  |
| Missing due to skip pattern error in survey | 15 (71.4) | 6 (28.6) | 21 (13.4) |  |
| **Usual sexual positioning with male partner** |  |  |  | 0.430 |
| Usually insertive | 78 (75.7) | 25 (24.3) | 103 (65.2) |  |
| Usually receptive | 20 (83.3) | 4 (16.7) | 24 (15.2) |  |
| Usually versatile | 21 (67.7) | 10 (32.3) | 31 (19.6) |  |
| **Used a condom for last insertive anal intercourse in the past 6 months** |  |  |  |  |
| No | 12 (63.2) | 7 (36.8) | 19 (12.0) | 0.334 |
| Yes | 74 (78.7) | 20 (21.2) | 94 (59.5) |  |
| No insertive anal intercourse past 6 months | 33 (73.3) | 12 (26.7) | 45 (28.5) |  |
| **Used a condom for receptive anal intercourse in the past 6 months** |  |  |  |  |
| No | 7 (63.6) | 4 (36.3) | 11 (7.0) | 0.568 |
| Yes | 44 (74.6) | 15 (25.4) | 59 (37.3) |  |
| No RAI past 6 months | 68 (77.3) | 20 (22.7) | 88 (55.7) |  |
| **Used lubricant at last sex** |  |  |  |  |
| No | 15 (75.0) | 5 (25.0) | 20 (12.7) | 0.901 |
| Yes | 89 (76.0) | 28 (24.0) | 117 (74.1) |  |
| Missing | 15 (71.4) | 6 (28.6) | 21 (13.3) |  |
| **Had group sex within the past 6 months** |  |  |  |  |
| No | 103 (76.3) | 32 (23.7) | 135 (85.4) | 0.717 |
| Yes | 16 (72.7) | 6 (27.3) | 22 (13.9) |  |
| Refused to Answer | 0 | 1 | 1 |  |
| **Main partner circumcision status** |  |  |  |  |
| Uncircumcised | 6 (75.0) | 2 (25.0) | 8 (5.1) | 0.308 |
| Circumcised | 85 (78.7) | 23 (21.3) | 108 (68.2) |  |
| No main partner | 28 (66.7) | 14 (33.3) | 42 (26.7) |  |
| **Gave or received money or gifts for sex** |  |  |  |  |
| Neither gave nor received | 46 (71.9) | 18 (28.1) | 64 (40.8) | 0.341 |
| Gave or received | 73 (78.5) | 20 (21.5) | 93 (59.2) |  |

1 Chi-square p-values (Fisher’s exact value reported where any cell with n<5)

**Table 2: Distribution of Participant Characteristics Overall and by Rectal High Risk HPV Status**

| **Variable** | **Rectal HR-HPV Negative**  **N=154 (87.5%)**  **n (%)** | **Rectal HR-HPV Positive**  **N=22 (12.5%)**  **n (%)** | **Total**  **N=176**  **n (%)** | **P-value1** |
| --- | --- | --- | --- | --- |
| **Sociodemographics** |  |  |  |  |
| **Age group (years)** |  |  |  |  |
| 18-24 | 57 (87.7) | 8 (12.3) | 65 (36.9) | 0.997 |
| 25-29 | 56 (87.5) | 8 (12.5) | 64 (36.4) |  |
| 30-39 | 41 (87.2) | 6 (12.8) | 47 (26.7) |  |
| **Gender** |  |  |  |  |
| Man/Cis-male | 146 (89.6) | 17 (10.4) | 163 (92.6) | **0.003** |
| Trans, non-binary | 8 (61.5) | 5 (38.5) | 13 (7.4) |  |
| **Educational attainment** |  |  |  |  |
| Less than secondary school | 48 (94.1) | 3 (5.9) | 51 (29.1) | 0.122 |
| Completed secondary school | 58 (81.2) | 13 (18.3) | 71 (40.6) |  |
| More than secondary school | 47 (88.7) | 6 (11.3) | 53 (30.3) |  |
| **Current employment status** |  |  |  |  |
| Unemployed | 43 (86.0) | 7 (14.0) | 50 (28.4) | 0.722 |
| Part-time or Full-time Employed | 27 (90.0) | 3 (10.0) | 30 (17.1) |  |
| Self-Employed | 31 (67.3) | 4 (8.7) | 46 (26.1) |  |
| Between Jobs/Other | 42 (84.0) | 8 (16.0) | 50 (28.4) |  |
| **Biological Factors** |  |  |  |  |
| **Circumcision status** |  |  |  |  |
| Uncircumcised | 15 (83.3) | 3 (16.7) | 18 (10.2) | 0.476 |
| Circumcised | 139 (88.0) | 19 (12.0) | 158 (89.8) |  |
| **HIV Status** |  |  |  |  |
| Negative | 147 (89.6) | 17 (10.4) | 164 (93.2) | **0.002** |
| Positive | 7 (58.3) | 5 (41.7) | 12 (6.8) |  |
| **Rectal chlamydia and/or gonorrhea test results** |  |  |  |  |
| Negative | 146 (89.6) | 17 (10.4) | 163 (94.8) | **0.002** |
| Positive | 4 (44.4) | 5 (55.6) | 9 (5.2) |  |
| **Behavioral Factors** |  |  |  |  |
| **Receptive anal sex with a male partner ever** |  |  |  |  |
| No | 59 (96.7) | 2 (3.3) | 61 (34.7) | **0.007** |
| Yes | 95 (82.6) | 20 (17.4) | 115 (65.3) |  |
| **Insertive anal sex with a male partner ever** |  |  |  |  |
| No | 15 (78.9) | 4 (21.1) | 19 (10.8) | 0.265 |
| Yes | 139 (88.5) | 18 (11.5) | 157 (89.2) |  |
| **Vaginal or anal sex with a cisgender woman ever** |  |  |  |  |
| No | 49 (83.1) | 10 (16.9) | 59 (33.7) | 0.213 |
| Yes | 104 (89.7) | 12 (10.3) | 116 (66.3) |  |
| Refused to Answer | 1 | 0 | 1 |  |
| **Total different males had sex with in the past 6 months** |  |  |  |  |
| 0-1 | 43 (95.6) | 2 (4.4) | 45 (25.7) | **0.162** |
| 2 | 37 (80.4) | 9 (19.6) | 46 (26.3) |  |
| 3 | 26 (92.9) | 2 (7.1) | 28 (16.0) |  |
| 4 or more | 29 (82.9) | 6 (17.1) | 35 (20.0) |  |
| Missing due to skip pattern error in survey | 18 (85.7) | 3 (14.3) | 21 (12.0) |  |
| **Usual sexual positioning with male partner** |  |  |  | **0.001** |
| Usually insertive | 107 (93.9) | 7 (6.1) | 114 (64.8) |  |
| Usually receptive | 19 (70.4) | 8 (29.6) | 27 (15.3) |  |
| Usually versatile | 28 (80.0) | 7 (20.0) | 35 (19.9) |  |
| **Used a condom at last insertive anal intercourse** |  |  |  |  |
| No | 25 (92.6) | 2 (7.4) | 27 (15.3) | 0.99 |
| Yes | 93 (90.3) | 10 (9.7) | 103 (58.5) |  |
| No insertive anal intercourse in the past 6 months | 36 (78.3) | 10 (21.7) | 46 (26.1) |  |
| **Used a condom at last receptive anal intercourse** |  |  |  |  |
| No | 12 (92.3) | 1 (4.5) | 13 (7.4) | 0.440 |
| Yes | 49 (79.0) | 13 (21.0) | 62 (35.2) |  |
| No receptive anal intercourse in the past 6 months | 93 (92.1) | 8 (7.9) | 101 (57.4) |  |
| **Cleaned anus before sex** |  |  |  |  |
| No | 21 (77.8) | 6 (22.2) | 27 (15.5) | 0.550 |
| Yes | 61 (84.7) | 11 (15.3) | 72 (41.4) |  |
| No receptive anal intercourse | 70 (93.3) | 5 (6.7) | 75 (43.1) |  |
| **Cleaned anus after sex** |  |  |  |  |
| No | 17 (94.4) | 1 (5.6) | 18 (10.3) | 0.198 |
| Yes | 65 (80.2) | 16 (19.8) | 81 (46.5) |  |
| No receptive anal intercourse | 70 (93.3) | 5 (6.7) | 75 (43.1) |  |
| Refused to Answer | 2 | 0 | 2 |  |
| **Used lubricant at last sex** |  |  |  |  |
| No | 21 (95.5) | 1 (4.5) | 22 (12.5) | 0.513 |
| Yes | 115 (86.5) | 18 (13.5) | 133 (75.6) |  |
| Missing | 18 (85.7) | 3 (14.3) | 21 (11.9) |  |
| **Group sex in past 6 months** |  |  |  |  |
| No | 134 (86.5) | 21 (13.5) | 155 (88.1) | 0.475 |
| Yes | 19 (95.0) | 1 (5.0) | 20 (11.4) |  |
| Refused to Answer | 1 | 0 | 1 |  |
| **Main partner circumcision status** |  |  |  |  |
| Uncircumcised | 8 (88.9) | 1 (11.1) | 9 (5.1) | 0.919 |
| Circumcised | 108 (87.8) | 15 (12.2) | 123 (69.9) |  |
| No main partner | 38 (86.4) | 6 (13.6) | 44 (25.0) |  |
| **Gave or received money or gifts for sex** |  |  |  |  |
| Neither gave nor received | 63 (85.1) | 11 (14.9) | 74 (42.3) | 0.433 |
| Gave or received | 90 (89.1) | 11 (10.9) | 101 (57.7) |  |

1 Chi-square p-values (Fisher’s exact value reported where any cell with n<5)

**Table 3: Results of Unadjusted and Adjusted Poisson Regression: Prevalence Ratios of Factors Associated with Testing Positive for Any Penile and Rectal High-Risk HPV**

|  | **Unadjusted**  **Penile HR-HPV**  **Prevalence Ratio (95% CI), p-value** | **Adjusted, N=158**  **Penile HR-HPV**  **Prevalence Ratio (95% CI), p-value** | **Unadjusted**  **Rectal Penile HR-HPV**  **Prevalence Ratio (95% CI), p-value** | **Adjusted, N=172**  **Rectal Penile HR-HPV**  **Prevalence Ratio (95% CI), p-value** |
| --- | --- | --- | --- | --- |
| Current employment status (vs. unemployed)  Employed part-time or full-time  Self-employed  Between jobs/Other | 0.22 (0.05 – 0.91), 0.037  0.99 (0.51 – 1.93), 0.982  1.00 (0.52 – 1.92), 0.992 | 0.25 (0.06 – 0.99), 0.048  0.93 (0.48 – 1.80), 0.834  1.12 (0.58 – 2.15), 0.739 |  |  |
| Circumcised (vs. Uncircumcised) | 0.44 (0.24 – 0.82), 0.009 | 0.52 (0.24 – 1.11), 0.090 |  |  |
| HIV positive (vs. Negative) | 2.44 (1.26 – 4.70), 0.008 | 2.27 (1.00 – 5.16), 0.050 | 4.02 (1.79 – 0.03), 0.001 |  |
| Insertive anal sex with a male partner (yes vs. no) | 4.28 (0.63 – 29.3), 0.138 | 5.26 (0.92 – 30.1), 0.062 |  |  |
| Rectal chlamydia and/or gonorrhea Positive (vs. negative) |  |  | 5.33 (2.54 – 11.2),<0.001 | 3.34 (1.59 – 7.01), 0.001 |
| Gender: Trans/non-binary (vs. Cis-male) |  |  | 3.83 (0.86 – 17.1), 0.078 | 2.28 (1.05 – 4.93), 0.036 |
| Receptive Anal Intercourse Ever (Yes vs. No)1 |  |  | 5.30 (1.28 – 22.0), 0.022 | 3.97 (0.93 – 16.9), 0.062 |
| Number of different males had sex with in the last 6 months (vs. 0-1)  2 or more  Missing due to skip pattern |  |  | 3.51 (0.84 – 14.6), 0.085  3.21 (0.58 – 17.9), 0.183 |  |
| Cleaned anus after sex (vs. no)  Yes  No RAI |  |  | 3.56 (0.50 – 25.2), 0.205  1.20 (0.15 – 9.71), 0.864 |  |

1 Receptive anal intercourse ever and usual sexual positioning were highly correlated (Spearman’s rho=0.51) and receptive anal intercourse ever explained more variance than usual sexual positioning; therefore receptive anal intercourse ever was moved forward to multivariable modeling
